# Supplementary material for: Consumption of Fermented Foods Is Associated with Systematic Differences in the Gut Microbiome and Metabolome
Source: PubMed Central journal article supplement (PMC7380580; doi:10.1128/msystems.00901-19), 2020-03-17

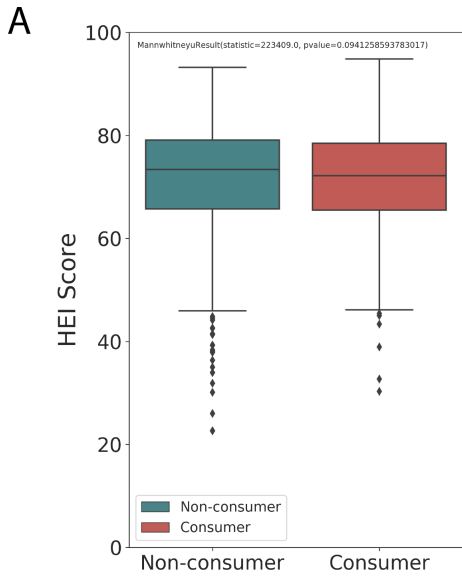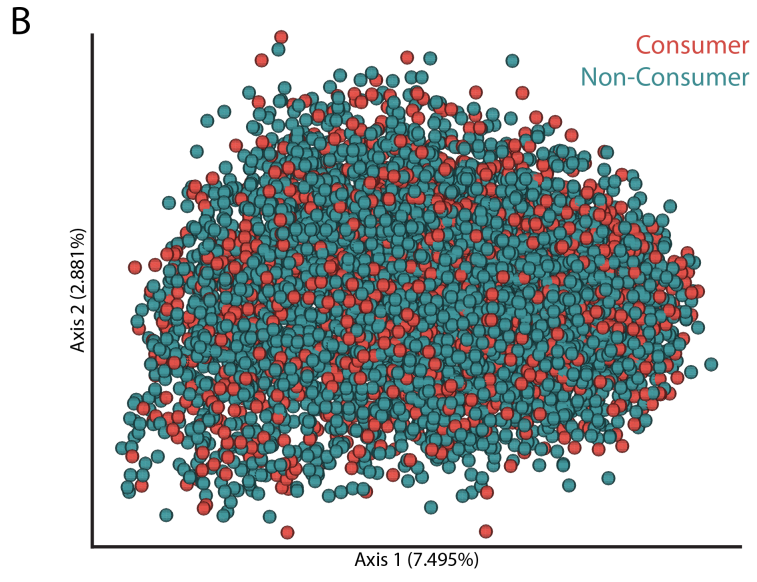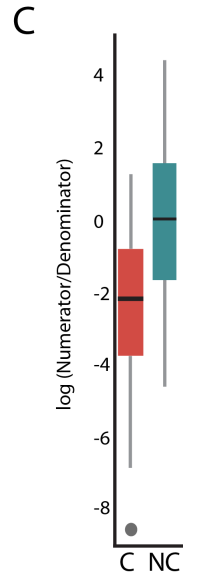

Supplement: mSystems.00901-19-sf001.pdf [file mSystems.00901-19-sf001.pdf]
