# Supplementary material for: Consumption of Fermented Foods Is Associated with Systematic Differences in the Gut Microbiome and Metabolome
Source: PubMed Central journal article supplement (PMC7380580; doi:10.1128/msystems.00901-19), 2020-03-17

## Demographic Data for Longitudinal Cohort Samples

**A**

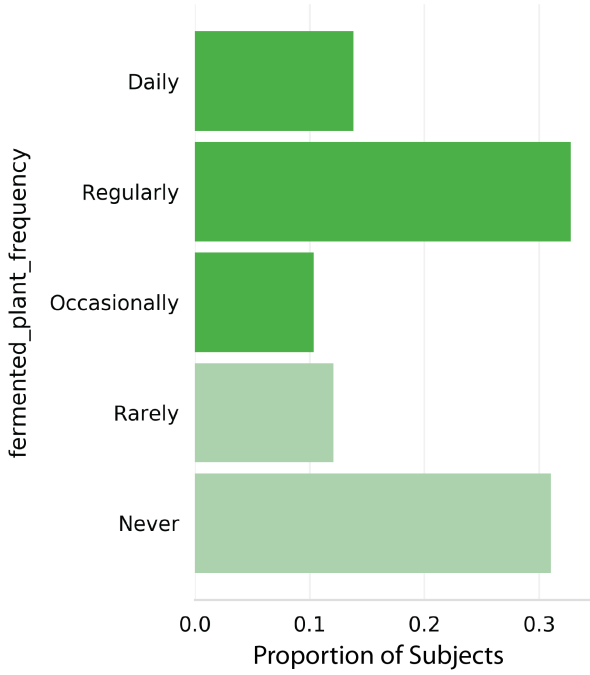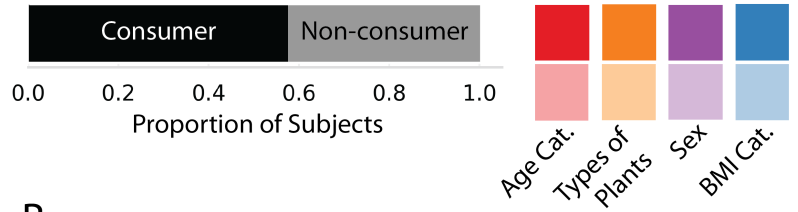

**B**

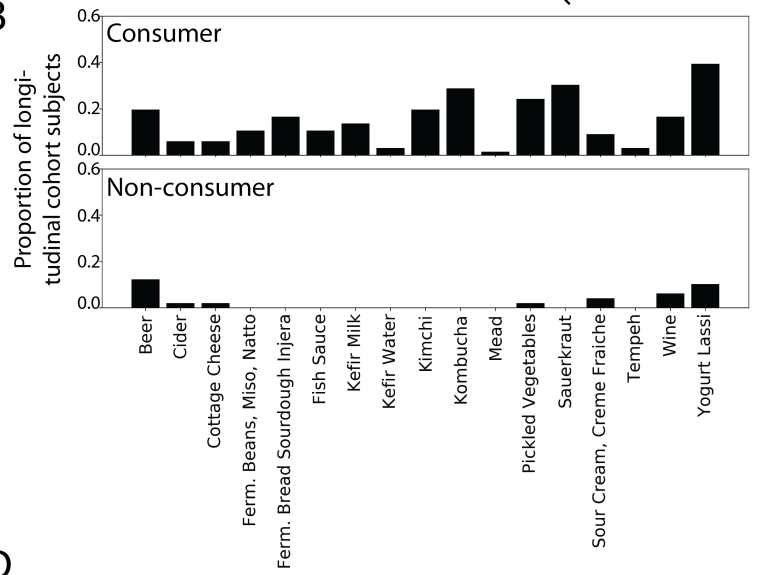

**C**

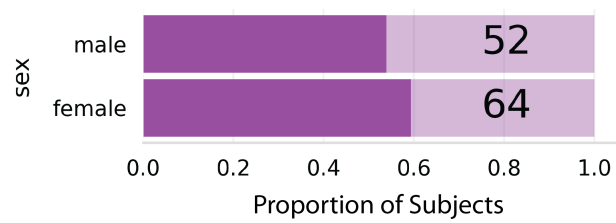

**D**

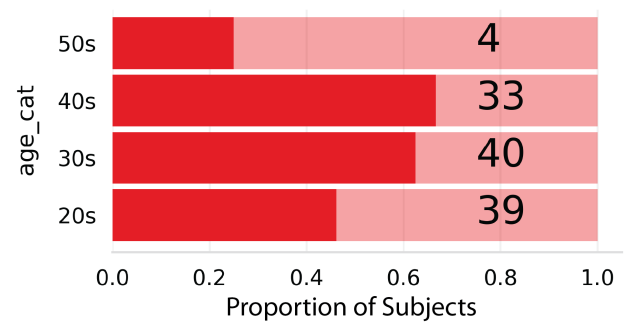

**E**

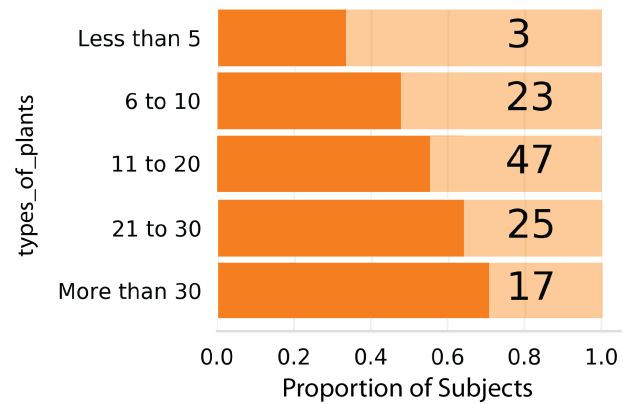

**F**

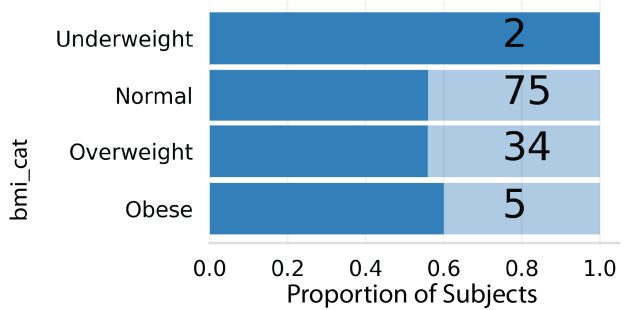

Supplement: mSystems.00901-19-sf003.pdf [file mSystems.00901-19-sf003.pdf]
