# Supplementary material for: Consumption of Fermented Foods Is Associated with Systematic Differences in the Gut Microbiome and Metabolome
Source: PubMed Central journal article supplement (PMC7380580; doi:10.1128/msystems.00901-19), 2020-03-17

16S

● Consumer ● Non-consumer

Metabolomics

t0 vs. t1

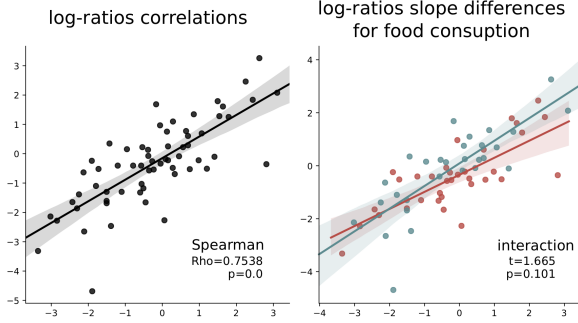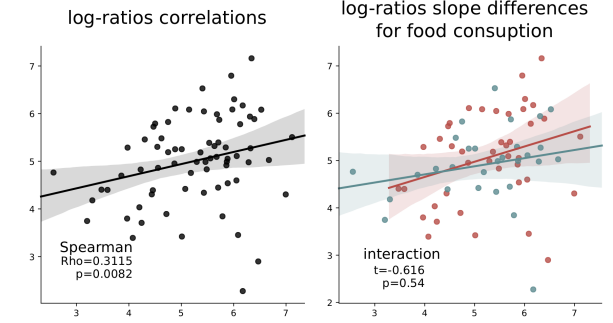

t1 vs. t2

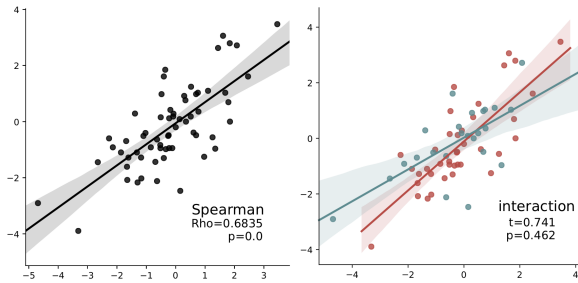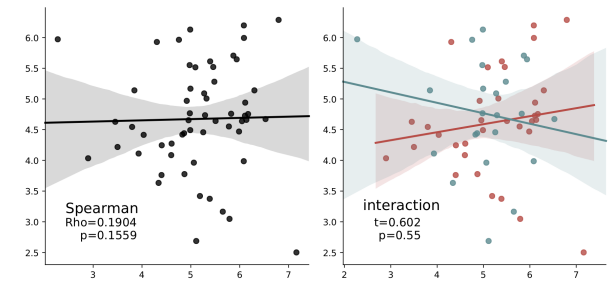

t2 vs. t3

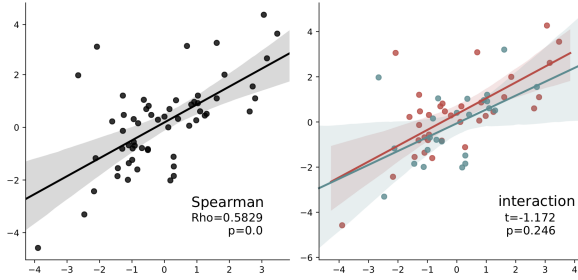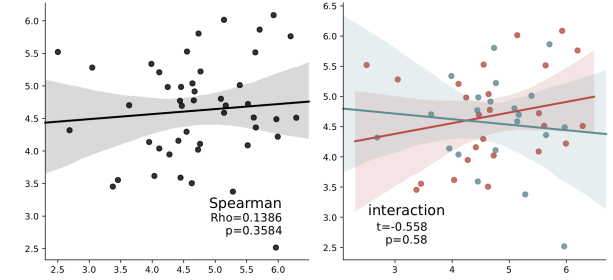

Supplement: mSystems.00901-19-sf005.pdf [file mSystems.00901-19-sf005.pdf]
