# Supplementary material for: Consumption of Fermented Foods Is Associated with Systematic Differences in the Gut Microbiome and Metabolome
Source: PubMed Central journal article supplement (PMC7380580; doi:10.1128/msystems.00901-19), 2020-03-17
Supplement: mSystems.00901-19-st001.pdf [file mSystems.00901-19-st001.pdf]

|                                 | Consumer (n = 147)     | Non-consumer (n = 163) | p-value |
|---------------------------------|------------------------|------------------------|---------|
| Total energy, kcal/d            | 1845 ± 615 (605, 3634) | 1855 ± 728 (467, 5672) | NS      |
| Total Carbohydrate, <i>g/d</i>  | 173 ± 78 (33, 406)     | 197 ± 93 (8, 552)      | 0.012   |
| Total Carbohydrate, % of energy | 39 ± 15 (9, 94)        | 43 ± 13 (1.4, 81)      | <0.001  |
| Total Fat, <i>g/d</i>           | 90 ± 44 (5, 239)       | 80 ± 40 (12, 266)      | 0.014   |
| Total Fat, % of energy          | 42 ± 7 (7, 63)         | 37 ± 5 (23, 48)        | <0.001  |
| Total Protein, <i>g/d</i>       | 79 ± 34 (15, 195)      | 77 ± 45 (18, 457)      | NS      |
| Total Protein, % of energy      | 17 ± 2 (10, 22)        | 16 ± 2 (15, 32)        | <0.001  |
| Total Dietary Fiber, <i>g/d</i> | 27 ± 12                | 26 ± 11 (0, 59)        | NS      |
