# Supplementary material for: Consumption of Fermented Foods Is Associated with Systematic Differences in the Gut Microbiome and Metabolome
Source: PubMed Central journal article supplement (PMC7380580; doi:10.1128/msystems.00901-19), 2020-03-17
Supplement: mSystems.00901-19-st002.pdf [file mSystems.00901-19-st002.pdf]

| Consumer     | Non-consumer | Alpha Diversity Metric | H-statistic | p-value |
|--------------|--------------|------------------------|-------------|---------|
| Daily        | Rarely       | Faith's PD             | 1.2998      | 0.2543  |
|              |              | Shannon                | 1.4434      | 0.2296  |
|              |              | ObservedOTUs           | 1.328       | 0.2492  |
| Daily        | Never        | Faith's PD             | 0.3275      | 0.5671  |
|              |              | Shannon                | 0.4501      | 0.5023  |
|              |              | ObservedOTUs           | 2.1045      | 0.1469  |
| Regularly    | Never        | Faith's PD             | 1.4185      | 0.2336  |
|              |              | Shannon                | 0.3848      | 0.535   |
|              |              | ObservedOTUs           | 0.0451      | 0.8317  |
| Occasionally | Never        | Faith's PD             | 0.2723      | 0.6018  |
|              |              | Shannon                | 0.0         | 0.9975  |
|              |              | ObservedOTUs           | 3.1067      | 0.078   |
