# Supplementary material for: Consumption of Fermented Foods Is Associated with Systematic Differences in the Gut Microbiome and Metabolome
Source: PubMed Central journal article supplement (PMC7380580; doi:10.1128/msystems.00901-19), 2020-03-17
Supplement: mSystems.00901-19-st003.pdf [file mSystems.00901-19-st003.pdf]

| Sets  | Taxa                                                                                                                                                                                                                                                                                                                                                                                                                                                                                                                                                                                                                                                                                                                                                                                                                                                                                                                                                                                                                                                                                                                                                                                                                                                                                                                                                                                      |
|-------|-------------------------------------------------------------------------------------------------------------------------------------------------------------------------------------------------------------------------------------------------------------------------------------------------------------------------------------------------------------------------------------------------------------------------------------------------------------------------------------------------------------------------------------------------------------------------------------------------------------------------------------------------------------------------------------------------------------------------------------------------------------------------------------------------------------------------------------------------------------------------------------------------------------------------------------------------------------------------------------------------------------------------------------------------------------------------------------------------------------------------------------------------------------------------------------------------------------------------------------------------------------------------------------------------------------------------------------------------------------------------------------------|
| Set 1 | Lachnospiraceae, <i>Coprococcus eutacus</i> , <i>Cronobacter sakazakii</i> , Enterobacteriaceae, <i>Pseudomonas stutzeri</i> , Cyanobacteria order YS2, <i>Prevotella</i> spp., <i>Prevotella copri</i> , Alphaproteobacteria order RF32, Fusobacteriaceae, <i>Bacteroides coprophilus</i> , <i>Bacteroides</i> spp., Bacteroidales family S24-7, <i>Coprococcus</i> spp.                                                                                                                                                                                                                                                                                                                                                                                                                                                                                                                                                                                                                                                                                                                                                                                                                                                                                                                                                                                                                 |
| Set 2 | <i>Bacteroides</i> spp., <i>Pseudomonas</i> spp., <i>Dorea</i> spp., Lachnospiraceae, <i>Prevotella</i> spp., <i>Alistipes putredinis</i> , <i>Oscillospira</i> spp., Enterobacteriaceae, <i>Fusobacterium</i> spp., <i>Actinomyces</i> spp., <i>Achromobacter</i> spp., <i>Clostridium clostridioforme</i> , <i>Faecalibacterium prausnitzii</i> , <i>Bacteroides uniformis</i> , Clostridiales, <i>Delftia</i> spp.                                                                                                                                                                                                                                                                                                                                                                                                                                                                                                                                                                                                                                                                                                                                                                                                                                                                                                                                                                     |
| Set 3 | <i>Lactobacillus acidophilus</i> , <i>Lactobacillus brevis</i> , <i>Lactobacillus fermentum</i> , <i>Lactococcus lactis</i> , <i>Leuconostoc mesenteroides</i> , <i>Lactobacillus paracasei</i> , <i>Lactobacillus plantarum</i> , and <i>Lactobacillus rhamnosus</i> .                                                                                                                                                                                                                                                                                                                                                                                                                                                                                                                                                                                                                                                                                                                                                                                                                                                                                                                                                                                                                                                                                                                   |
| Set 4 | <i>Blautia obeum</i> , [ <i>Eubacterium</i> ] <i>hallii</i> , <i>Ruminococcus faecis</i> , <i>Blautia</i> sp. KLE_1732, <i>Clostridium</i> sp. L2-50, <i>Faecalibacterium prausnitzii</i> , <i>Blautia obeum</i> , <i>Roseburia inulinivorans</i> , <i>Roseburia intestinalis</i> , <i>Bacteroides thetaiotaomicron</i> , [ <i>Eubacterium</i> ] <i>rectale</i> , <i>Bacteroides ovatus</i> , <i>Bacteroides plebeius</i> , <i>Alistipes putredinis</i> , <i>Bacteroides uniformis</i> , <i>Bacteroides vulgatus</i> , <i>Escherichia coli</i> .                                                                                                                                                                                                                                                                                                                                                                                                                                                                                                                                                                                                                                                                                                                                                                                                                                          |
| Set 5 | <i>Streptococcus dysgalactiae</i> , Lachnospiraceae bacterium oral taxon 500, <i>Prevotella melaninogenica</i> , <i>Megamonas hypermegale</i> , <i>Proteus mirabilis</i> , <i>Actinomyces</i> sp. oral taxon 448, <i>Leclercia adecarboxylata</i> , <i>Comamonas kerstersii</i> , <i>Pontibacillus chungwhensis</i> , <i>Citrobacter freundii</i> , <i>Enorma massiliensis</i> , <i>Rhizobium</i> sp. Root651, <i>Enterococcus cecorum</i> , <i>Pseudomonas xanthomarina</i> , <i>Peptoniphilus</i> sp. ChDC B134, <i>Clostridioides difficile</i> , <i>Prevotella multififormis</i> , <i>Lactobacillus kefiranoformis</i> , <i>Neisseria mucosa</i> , <i>Bifidobacterium psychraerophilum</i> , <i>Lactobacillus brevis</i> , <i>Eubacterium</i> sp. AB3007, <i>Lactobacillus parabuchneri</i> , <i>Bifidobacterium minimum</i> , <i>Prevotella intermedia</i> , <i>Jonquetella anthropi</i> , Lachnospiraceae bacterium M18-1, <i>Lactobacillus acidophilus</i> , <i>Clostridium perfringens</i> , [ <i>Clostridium</i> ] <i>sporospaeroides</i> , <i>Streptococcus infantis</i> , <i>Lactobacillus acetotolerans</i> , <i>Bacteroides paurosaccharolyticus</i> , <i>Corynebacterium lactis</i> , <i>Streptococcus mitis</i> , <i>Eggerthella</i> sp. YY7918, <i>Lactobacillus helveticus</i> , <i>Kandleria vitulina</i> , <i>Serratia liquefaciens</i> , <i>Lactobacillus sakei</i> . |
| Set 6 | <i>Bacteroides coprophilus</i> , <i>Bacteroides ovatus</i> , <i>Sutterella wadsworthensis</i> , <i>Prevotella bivia</i> , <i>Prevotella copri</i> , <i>Acidaminococcus intestini</i> , <i>Coprobacter fastidiosus</i> , <i>Bacteroides cellulosilyticus</i> , <i>Prevotella stercorea</i> , [ <i>Ruminococcus</i> ] <i>torques</i> , <i>Dorea longicatena</i> , <i>Sutterella wadsworthensis</i> , <i>Flavonifractor plautii</i> , <i>Finegoldia magna</i> , [ <i>Eubacterium</i> ] <i>rectale</i> , <i>Roseburia intestinalis</i> , <i>Bacteroides vulgatus</i> , <i>Porphyromonas crevioricanis</i> , <i>Blautia</i> sp. KLE 1732, <i>Escherichia coli</i> , <i>Blautia obeum</i> , <i>Roseburia inulinivorans</i> , [ <i>Clostridium</i> ] <i>lactatifermentans</i> , <i>Faecalicatena contorta</i> , <i>Alistipes finegoldii</i> , [ <i>Clostridium</i> ] <i>bolteae</i> , <i>Collinsella intestinalis</i> , <i>Campylobacter hominis</i> , <i>Coprococcus comes</i> , <i>Coprobacter secundus</i> , <i>Eubacterium ventriosum</i> , <i>Bacteroides plebeius</i> , <i>Methanobrevibacter smithii</i> , <i>Parabacteroides distasonis</i> , <i>Tyzzereella nexilis</i> , <i>Bacteroides salanitronis</i> , <i>Clostridium</i> sp. KLE 1755, <i>Collinsella aerofaciens</i> , <i>Khuyvera intermedia</i> , <i>Staphylococcus aureus</i> .                                               |
