# Supplementary material for: Consumption of Fermented Foods Is Associated with Systematic Differences in the Gut Microbiome and Metabolome
Source: PubMed Central journal article supplement (PMC7380580; doi:10.1128/msystems.00901-19), 2020-03-17
Supplement: mSystems.00901-19-st004.pdf [file mSystems.00901-19-st004.pdf]

| CLA-producer                 | Feature                                                                                                                                  | mmvecPC1 | mmvecRank | #Cons. | #Non-cons. |
|------------------------------|------------------------------------------------------------------------------------------------------------------------------------------|----------|-----------|--------|------------|
| other                        | k__Bacteria; p__Bacteroidetes; c__Bacteroidia; o__Bacteroidales; f__Bacteroidaceae; g__Bacteroides; s__Bacteroides_vulgatus              | -0.057   | 6.223     | 43     | 36         |
| other                        | k__Bacteria; p__Bacteroidetes; c__Bacteroidia; o__Bacteroidales; f__Bacteroidaceae; g__Bacteroides; s__Bacteroides_uniformis             | -0.031   | 5.617     | 43     | 36         |
| other                        | k__Bacteria; p__Proteobacteria; c__Gammaproteobacteria; o__Enterobacteriales; f__Enterobacteriaceae; g__Escherichia; s__Escherichia_coli | -0.146   | 5.265     | 43     | 36         |
| other                        | k__Bacteria; p__Bacteroidetes; c__Bacteroidia; o__Bacteroidales; f__Rikenellaceae; g__Alistipes; s__Alistipes_putredinis                 | -0.181   | 4.931     | 43     | 36         |
| other                        | k__Bacteria; p__Bacteroidetes; c__Bacteroidia; o__Bacteroidales; f__Prevotellaceae; g__Prevotella; s__Prevotella_copri                   | -0.099   | 4.777     | 24     | 25         |
| other                        | k__Bacteria; p__Bacteroidetes; c__Bacteroidia; o__Bacteroidales; f__Bacteroidaceae; g__Bacteroides; s__Bacteroides_ovatus                | -0.050   | 4.643     | 43     | 36         |
| other                        | k__Bacteria; p__Bacteroidetes; c__Bacteroidia; o__Bacteroidales; f__Bacteroidaceae; g__Bacteroides; s__Bacteroides_stercoris             | -0.042   | 4.526     | 42     | 36         |
| Eubacterium rectale          | k__Bacteria; p__Firmicutes; c__Clostridia; o__Clostridiales; f__Lachnospiraceae; g__--; s__[Eubacterium]_rectale                         | -0.042   | 4.264     | 43     | 36         |
| other                        | k__Bacteria; p__Bacteroidetes; c__Bacteroidia; o__Bacteroidales; f__Bacteroidaceae; g__Bacteroides; s__Bacteroides_thetaiotaomicron      | -0.004   | 4.244     | 43     | 36         |
| other                        | k__Bacteria; p__Bacteroidetes; c__Bacteroidia; o__Bacteroidales; f__Rikenellaceae; g__Alistipes; s__Alistipes_finegoldii                 | -0.099   | 3.744     | 43     | 35         |
| other                        | k__Bacteria; p__Bacteroidetes; c__Bacteroidia; o__Bacteroidales; f__Bacteroidaceae; g__Bacteroides; s__Bacteroides_plebeius              | -0.046   | 3.687     | 43     | 36         |
| other                        | k__Bacteria; p__Firmicutes; c__Clostridia; o__Clostridiales; f__Lachnospiraceae; g__Blautia; s__Blautia_obeum                            | -0.137   | 3.640     | 43     | 36         |
| other                        | k__Bacteria; p__Bacteroidetes; c__Bacteroidia; o__Bacteroidales; f__Bacteroidaceae; g__Bacteroides; s__Bacteroides_coprocola             | -0.068   | 3.616     | 41     | 36         |
| Roseburia                    | k__Bacteria; p__Firmicutes; c__Clostridia; o__Clostridiales; f__Lachnospiraceae; g__Roseburia; s__Roseburia_intestinalis                 | -0.059   | 3.611     | 43     | 36         |
| other                        | k__Bacteria; p__Bacteroidetes; c__Bacteroidia; o__Bacteroidales; f__Rikenellaceae; g__Alistipes; s__Alistipes_shahii                     | -0.065   | 3.579     | 42     | 35         |
| other                        | k__Bacteria; p__Bacteroidetes; c__Bacteroidia; o__Bacteroidales; f__Tannerellaceae; g__Parabacteroides; s__Parabacteroides_distasonis    | -0.050   | 3.573     | 42     | 35         |
| Faecalibacterium prausnitzii | k__Bacteria; p__Firmicutes; c__Clostridia; o__Clostridiales; f__Ruminococcaceae; g__Faecalibacterium; s__Faecalibacterium_prausnitzii    | -0.062   | 3.569     | 43     | 36         |
| other                        | k__Bacteria; p__Bacteroidetes; c__Bacteroidia; o__Bacteroidales; f__Bacteroidaceae; g__Bacteroides; s__Bacteroides_cellulosilyticus      | -0.027   | 3.499     | 43     | 36         |

|                        |                                                                                                                                                      |        |       |    |    |
|------------------------|------------------------------------------------------------------------------------------------------------------------------------------------------|--------|-------|----|----|
| other                  | k__Bacteria; p__Bacteroidetes; c__Bacteroidia;<br>o__Bacteroidales; f__Barnesiellaceae;<br>g__Barnesiella; s__Barnesiella_intestinihominis           | -0.028 | 3.462 | 35 | 32 |
| Roseburia              | k__Bacteria; p__Firmicutes; c__Clostridia;<br>o__Clostridiales; f__Lachnospiraceae;<br>g__Roseburia; s__Roseburia_inulinivorans                      | -0.047 | 3.419 | 43 | 36 |
| Anaerostipes           | k__Bacteria; p__Firmicutes; c__Clostridia;<br>o__Clostridiales; f__Lachnospiraceae;<br>g__Anaerostipes; s__Anaerostipes_hadrus                       | -0.092 | 3.398 | 42 | 35 |
| Roseburia              | k__Bacteria; p__Firmicutes; c__Clostridia;<br>o__Clostridiales; f__Lachnospiraceae;<br>g__Roseburia; s__Roseburia_faecis                             | -0.074 | 3.389 | 43 | 35 |
| other                  | k__Bacteria; p__Bacteroidetes; c__Bacteroidia;<br>o__Bacteroidales; f__Odoribacteraceae;<br>g__Odoribacter; s__Odoribacter_splanchnicus              | 0.004  | 3.329 | 42 | 36 |
| other                  | k__Bacteria; p__Bacteroidetes; c__Bacteroidia;<br>o__Bacteroidales; f__Bacteroidaceae;<br>g__Bacteroides; s__Bacteroides_fragilis                    | 0.009  | 3.289 | 42 | 33 |
| Ruminococcus           | k__Bacteria; p__Firmicutes; c__Clostridia;<br>o__Clostridiales; f__Ruminococcaceae;<br>g__Ruminococcus; s__Ruminococcus_bicirculans                  | -0.047 | 3.192 | 37 | 30 |
| other                  | k__Bacteria; p__Verrucomicrobia;<br>c__Verrucomicrobiae; o__Verrucomicrobiales;<br>f__Akkermansiaceae; g__Akkermansia;<br>s__Akkermansia_muciniphila | 0.045  | 3.162 | 26 | 12 |
| other                  | k__Bacteria; p__Proteobacteria;<br>c__Betaproteobacteria; o__Burkholderiales;<br>f__Sutterellaceae; g__Sutterella;<br>s__Sutterella_wadsworthensis   | -0.116 | 3.145 | 17 | 29 |
| other                  | k__Bacteria; p__Bacteroidetes; c__Bacteroidia;<br>o__Bacteroidales; f__Tannerellaceae;<br>g__Parabacteroides; s__Parabacteroides_johnsonii           | -0.086 | 2.896 | 41 | 36 |
| Eubacterium<br>siraeum | k__Bacteria; p__Firmicutes; c__Clostridia;<br>o__Clostridiales; f__Ruminococcaceae;<br>g__Ruminiclostridium; s__[Eubacterium]_siraeum                | 0.001  | 2.881 | 22 | 16 |
| other                  | k__Bacteria; p__Firmicutes; c__Clostridia;<br>o__Clostridiales; f__Oscillospiraceae;<br>g__Oscillibacter; s__Oscillibacter_sp_ER4                    | 0.018  | 2.857 | 43 | 35 |
| other                  | k__Bacteria; p__Bacteroidetes; c__Bacteroidia;<br>o__Bacteroidales; f__Bacteroidaceae;<br>g__Bacteroides; s__Bacteroides_salyersiae                  | -0.025 | 2.841 | 41 | 35 |
| Eubacterium            | k__Bacteria; p__Firmicutes; c__Clostridia;<br>o__Clostridiales; f__Eubacteriaceae;<br>g__Eubacterium; s__[Eubacterium]_eligens                       | -0.007 | 2.816 | 38 | 32 |
| other                  | k__Bacteria; p__Bacteroidetes; c__Bacteroidia;<br>o__Bacteroidales; f__Rikenellaceae; g__Alistipes;<br>s__Alistipes_obesi                            | -0.043 | 2.805 | 39 | 35 |
| other                  | k__Bacteria; p__Firmicutes; c__Clostridia;<br>o__Clostridiales; f__Lachnospiraceae; g__Blautia;<br>s__Blautia_sp_KLE_1732                            | -0.066 | 2.748 | 43 | 36 |
| other                  | k__Bacteria; p__Firmicutes; c__Clostridia;<br>o__Clostridiales; f__Lachnospiraceae; g__-;<br>s__Lachnospiraceae_bacterium_TF01-11                    | -0.021 | 2.738 | 37 | 34 |
| Roseburia              | k__Bacteria; p__Firmicutes; c__Clostridia;<br>o__Clostridiales; f__Lachnospiraceae;<br>g__Roseburia; s__Roseburia_hominis                            | -0.077 | 2.589 | 43 | 35 |

|                                 |                                                                                                                                                               |        |       |    |    |
|---------------------------------|---------------------------------------------------------------------------------------------------------------------------------------------------------------|--------|-------|----|----|
| other                           | k__Bacteria; p__Firmicutes; c__Clostridia;<br>o__Clostridiales; f__Oscillospiraceae;<br>g__Oscillibacter; s__Oscillibacter_sp._KLE_1745                       | -0.042 | 2.566 | 42 | 35 |
| Ruminococcus                    | k__Bacteria; p__Firmicutes; c__Clostridia;<br>o__Clostridiales; f__Ruminococcaceae;<br>g__Ruminococcus; s__Ruminococcus_faecis                                | -0.028 | 2.554 | 43 | 36 |
| Eubacterium<br>hallii           | k__Bacteria; p__Firmicutes; c__Clostridia;<br>o__Clostridiales; f__Eubacteriaceae;<br>g__Eubacterium; s__[Eubacterium]_hallii                                 | -0.046 | 2.539 | 43 | 36 |
| other                           | k__Bacteria; p__Firmicutes; c__Clostridia;<br>o__Clostridiales; f__Lachnospiraceae;<br>g__Coprococcus; s__Coprococcus_comes                                   | -0.051 | 2.419 | 43 | 35 |
| other                           | k__Bacteria; p__Bacteroidetes; c__Bacteroidia;<br>o__Bacteroidales; f__Prevotellaceae; g__Prevotella;<br>s__Prevotella_sp._109                                | 0.001  | 2.404 | 41 | 35 |
| other                           | k__Bacteria; p__Firmicutes; c__Clostridia;<br>o__Clostridiales; f__Lachnospiraceae; g__Dorea;<br>s__Dorea_longicatena                                         | -0.038 | 2.403 | 41 | 35 |
| other                           | k__Bacteria; p__Firmicutes; c__Clostridia;<br>o__Clostridiales; f__Lachnospiraceae;<br>g__Tyzzerella; s__Tyzzerella_nexilis                                   | -0.058 | 2.388 | 43 | 35 |
| Bifidobacterium<br>adolescentis | k__Bacteria; p__Actinobacteria;<br>c__Actinobacteria; o__Bifidobacteriales;<br>f__Bifidobacteriaceae; g__Bifidobacterium;<br>s__Bifidobacterium_adolescentis  | -0.035 | 2.342 | 30 | 25 |
| other                           | k__Bacteria; p__-; c__-; o__-; f__-; g__-; s__bacterium_LF-3                                                                                                  | -0.045 | 2.281 | 39 | 32 |
| other                           | k__Bacteria; p__Bacteroidetes; c__Bacteroidia;<br>o__Bacteroidales; f__Bacteroidaceae;<br>g__Bacteroides; s__Bacteroides_coprophilus                          | -0.011 | 2.169 | 42 | 35 |
| other                           | k__Bacteria; p__Proteobacteria;<br>c__Betaproteobacteria; o__Burkholderiales;<br>f__Sutterellaceae; g__Parasutterella;<br>s__Parasutterella_excrementihominis | -0.029 | 2.130 | 33 | 28 |
| other                           | k__Bacteria; p__Firmicutes; c__Negativicutes;<br>o__Veillonellales; f__Veillonellaceae; g__Dialister;<br>s__Dialister_invisus                                 | -0.034 | 2.114 | 14 | 12 |
| Clostridium                     | k__Bacteria; p__Firmicutes; c__Clostridia;<br>o__Clostridiales; f__Clostridiaceae; g__Clostridium;<br>s__Clostridium_sp._L2-50                                | -0.108 | 2.113 | 43 | 36 |
| Eubacterium                     | k__Bacteria; p__Firmicutes; c__Clostridia;<br>o__Clostridiales; f__Eubacteriaceae;<br>g__Eubacterium; s__Eubacterium_ramulus                                  | -0.041 | 1.975 | 43 | 34 |
